23 75724 Paris, France; RB: Instituto de Investigación en Biomedicina de Buenos Aires (IBioBA)-

24 CONICET-Partner Institute of the Max Planck Society, Buenos Aires, Argentina.

25 # To whom correspondence should be addressed: MNL ([lisa@ibr-conicet.gov.ar](mailto:lisa@ibr-conicet.gov.ar)) or PMA

26 ([pedro.alzari@pasteur.fr](mailto:pedro.alzari@pasteur.fr)).

27

28

29 **ABSTRACT**

30 Signal transduction is essential for bacteria to adapt to changing environmental conditions.  
31 Among many forms of post-translational modifications, reversible protein phosphorylation has  
32 evolved as a ubiquitous molecular mechanism of protein regulation in response to specific stimuli.  
33 The Ser/Thr protein kinase PknG modulates the fate of intracellular glutamate by controlling the  
34 phosphorylation status of the 2-oxoglutarate dehydrogenase regulator OdhI, a function that is  
35 conserved among diverse actinobacteria. PknG has a modular organization characterized by the  
36 presence of regulatory domains surrounding the catalytic domain. Here we present an  
37 investigation through *in vivo* experiments as well as biochemical and structural methods of the  
38 molecular bases of the regulation of PknG from *C. glutamicum* (*CgPknG*), in the light of previous  
39 knowledge available for the kinase from *M. tuberculosis* (*MtbPknG*). We found that OdhI  
40 phosphorylation by *CgPknG* is regulated by a conserved mechanism that depends on a C-terminal  
41 domain composed of tetratricopeptide repeats (TPR) essential for metabolic homeostasis.  
42 Furthermore, we identified a conserved structural motif that physically connects the TPR domain  
43 and a flexible N-terminal extension of the kinase that is involved in docking interactions with OdhI.  
44 Based on our results and previous reports, we propose a model in which the TPR domain of PknG  
45 couples signal detection to the specific phosphorylation of OdhI. Overall, the available data  
46 indicate that conserved PknG domains in distant actinobacteria retain their roles in kinase  
47 regulation in response to nutrient availability.

48

49 **IMPORTANCE**

50 Bacteria control the metabolic processes by which they obtain nutrients and energy in order  
51 to adapt to the environment. In this way, the metabolic characteristics of a microorganism  
52 determine its ecological role and its usefulness in industrial processes. Here, we use genetic,  
53 biochemical, and structural approaches to study a key component in a system that regulates  
54 glutamate production in *C. glutamicum*, a species that is used for the industrial production of  
55 amino acids. We elucidated molecular mechanisms involved in metabolic control in *C. glutamicum*,  
56 which are conserved in related pathogenic bacteria. The findings have broader significance for  
57 diverse actinobacteria, including microorganisms that cause disease as well as environmental  
58 species used to produce billions of dollars of amino acids and antibiotics every year.

59

## 60 INTRODUCTION

61 The large and ancient bacterial phylum *Actinobacteria* comprises species with very diverse  
62 lifestyles and physiological adaptations, including soil inhabitants, pathogens as well as plant or  
63 animal commensals (1). The eukaryotic-like Ser/Thr protein kinase (STPK) PknG and its FHA  
64 (ForkHead-Associated) substrate OdhI (Oxoglutarate dehydrogenase Inhibitor) are at the core of a  
65 conserved signal transduction pathway that modulates central metabolism in distant  
66 actinobacteria. Both in *Corynebacterium glutamicum*, a soil bacterium used for the industrial  
67 production of amino acids, as well as in the pathogen *Mycobacterium tuberculosis*, PknG  
68 modulates the 2-oxoglutarate dehydrogenase activity in the Krebs cycle (2–4) by controlling the  
69 phosphorylation status of the regulator OdhI (called GarA in the genus *Mycobacterium*) (2–5).  
70 Biochemical studies have demonstrated that unphosphorylated OdhI/GarA inhibits the E1  
71 component (OdhA) of the 2-oxoglutarate dehydrogenase complex whereas this inhibition is

72 relieved by OdhI/GarA phosphorylation by PknG (2–4, 6, 7). Moreover, early studies for the two  
73 species revealed that *pknG* disruption leads to an accumulation of intracellular glutamate (2, 8),  
74 pointing out that PknG acts by promoting catabolism at the expense of 2-oxoglutarate usage in  
75 nitrogen assimilation. On top of this, it was recently found that PknG senses the availability of  
76 amino-donor amino acids to control metabolism and virulence in *M. tuberculosis* (9–11). These  
77 findings have received much attention (10), as a deeper understanding of PknG regulation can be  
78 instrumental for downstream applications in the biotech and pharmaceutical areas.

79 PknG has a unique modular organization characterized by the ubiquitous presence of a  
80 flexible N-terminal segment and a C-terminal domain composed of tetratricopeptide repeats (TPR)  
81 flanking the kinase catalytic core (12–14). An additional rubredoxin (Rdx)-like domain occurs  
82 immediately adjacent to the catalytic core in PknG from mycobacteria and most other  
83 actinobacteria but not in corynebacteria (2). Previous structural studies of PknG have focused on  
84 the protein from *M. tuberculosis* (*MtbPknG*) (12, 13). We have shown that the N-terminal  
85 extension and the TPR domain of *MtbPknG* regulate the selectivity for GarA without significantly  
86 affecting the intrinsic kinase activity, whereas the Rdx domain downregulates catalysis by limiting  
87 access to a profound substrate-binding site (13). Rdx domains are known to transmit redox stimuli  
88 and, consistent with this, evidence has been reported pointing out that perturbations of the metal  
89 center in PknG lead to alterations of the kinase activity (15). However, relatively little is known  
90 about the regulatory mechanisms of PknG isoforms that lack an Rdx domain.

91 The gene *pknG* is found within a conserved operon that contains two other genes, *glnX* and  
92 *glnH*, which encode a putative transmembrane protein and a putative glutamine-binding  
93 lipoprotein, respectively (2, 11). The observation that disruption of any of those genes in *C.*

94 *glutamicum* led to a similar phenotype consisting of a growth defect in medium containing  
95 glutamine as the sole carbon source (2) suggested a common role of the protein products in  
96 metabolic homeostasis. Supporting this early hypothesis, evidence has been recently reported  
97 that, in mycobacteria, PknG and GlnX are functionally linked and that GlnH specifically binds amino  
98 acids able to stimulate GarA phosphorylation by the kinase (11). This led to the proposal that GlnH  
99 senses amino acid availability within the bacterial periplasm and transmits this information across  
100 the membrane *via* GlnX to activate PknG by protein-protein interactions (11). Most interesting, a  
101 PknG truncation mutant lacking the TPR domain failed to restore the growth defect of a *pknG*-  
102 disrupted mycobacterial strain, suggesting that this domain, often involved in protein-protein  
103 interactions (16), mediates molecular associations required for the kinase function (11).

104 To investigate the conservation of mechanisms involved in the regulation of PknG, we  
105 studied the kinase isoform from *C. glutamicum* (*CgPknG*), which is devoid of an Rdx domain. We  
106 provide evidence that the C-terminal region of *CgPknG*, bearing the TPR domain, is crucial for the  
107 efficient phosphorylation of Odh1 and for the kinase function in metabolic homeostasis. Moreover,  
108 our results point out that the recruitment of the FHA substrate is regulated by a conserved  
109 phosphorylation-dependent mechanism regardless of the absence of an Rdx domain. Finally, by  
110 comparing three high-resolution crystal structures of *CgPknG* and an available structure of  
111 *MtbPknG* (12), we identified a conserved motif able to link the N-terminal extension and the TPR  
112 domain. Interestingly, the evidence suggests that the Rdx domain, absent in corynebacteria, and  
113 the TPR domain would constitute independent regulatory mechanisms. Overall, our results  
114 indicate that common PknG domains in distant actinobacteria share similar functions in kinase  
115 regulation, linking PknG to the control of central metabolism in response to nutrient availability.

116

## 117 RESULTS

### 118 The C-terminal region of *CgPknG* is required for phosphorylation events that modulate 119 metabolism

120 To investigate the domains required for the function of *CgPknG*, we employed a previously  
121 characterized *C. glutamicum*  $\Delta pknG$  mutant strain able to grow in rich medium but unable to grow  
122 in medium containing glutamine as the sole carbon source (2). *CgPknG* domain boundaries were  
123 defined based on a previous characterization of *MtbPknG* (13) (47% amino acid identity), and  
124 plasmids were designed for the expression of *CgPknG* truncation mutants (Fig. 1A) in *C.*  
125 *glutamicum*  $\Delta pknG$  using the endogenous gene promoter. All strains grew normally in medium  
126 containing glucose and all versions of the kinase were detected by Western-blot (Fig. S1).

127 In contrast to wild type *CgPknG*, the mutant *CgPknG*<sub>K205A</sub>, which harbors a substitution of the  
128 invariant catalytic lysine, did not complement the growth defect of *C. glutamicum*  $\Delta pknG$  on  
129 glutamine (Fig. 1B), indicating that the kinase activity is required for protein function. Additionally,  
130 a *CgPknG* truncation mutant lacking residues 433-822 was unable to restore bacterial growth on  
131 glutamine, pointing out, in agreement with previous results for *MtbPknG* (11), that the region of  
132 *CgPknG* located C-terminally to the catalytic core is necessary for the kinase role in the control of  
133 metabolism. Moreover, *MtbPknG* did complement the growth defect of *C. glutamicum*  $\Delta pknG$ ,  
134 stressing the functional conservation between distant kinase isoforms. A *CgPknG* deletion mutant  
135 devoid of residues 1-130 failed to restore the growth of *C. glutamicum*  $\Delta pknG$  on glutamine,  
136 however the low amount detected of this kinase version precludes drawing conclusions from this

137 observation. Together, these results support a conserved requirement of the C-terminal region of  
138 PknG for phosphorylation events that modulate metabolism in response to amino acid availability.

139

#### 140 **A conserved phosphorylation-dependent mechanism for substrate recruitment**

141 To investigate the molecular mechanisms of metabolic control by the kinase activity of  
142 *CgPknG*, we first tested the ability of recombinant *CgPknG* to phosphorylate OdhI and GarA *in*  
143 *vitro*. *CgPknG* phosphorylated OdhI and GarA to a similar extent (**Fig. 2A**), confirming the ability of  
144 *CgPknG* to phosphorylate the FHA substrate and evidencing that structural differences between  
145 OdhI and GarA (4, 17), either in the FHA domain or in the N-terminal phosphorylatable region, do  
146 not influence the kinase activity. Moreover, *CgPknG* phosphorylated GarA in the same peptide as  
147 *MtbPknG* (3) (**Fig. S2**), equivalent to the OdhI peptide phosphorylated by *CgPknG* (2).

148 The N-terminal segment of *MtbPknG* contains auto-phosphorylation sites (Thr23, Thr32,  
149 Thr63 and Thr64) (3) (**Fig. 1A** and **Fig. S3**) that act as essential anchoring points for the recruitment  
150 of GarA by interacting with the pThr-binding FHA domain of the regulator (3, 13). Despite the  
151 crucial role of the N-terminal extension of the kinase in substrate selectivity, its primary structure  
152 is poorly conserved. Therefore, to determine whether or not the role of the kinase N-terminal  
153 segment in the recruitment of the FHA substrate is conserved in spite of sequence divergence, we  
154 first investigated the auto-phosphorylation of *CgPknG*. Despite no phosphorylation was detected  
155 in the purified recombinant protein, four phosphorylation sites (Thr14, Thr68, Thr92 and Thr93)  
156 were identified by mass spectrometry within the N-terminal extension of *CgPknG* after incubating  
157 the kinase with ATP and Mn(II) (**Fig. S3** and **Fig. S4**).



158           Next, we studied the ability of *CgPknG* to phosphorylate a substrate lacking an FHA domain,  
159 using for this the previously reported 17-mer SDEVTVETTSVFRADFL peptide (13) centered around  
160 the phosphorylatable ETTS motif that is conserved among OdhI/GarA homologs (2). The kinase  
161 activity of *CgPknG* varied linearly with the concentration of the 17-mer peptide up to 1 mM,  
162 indicating a high  $K_M$  ( $> 1$  mM) and the slope providing a measure of the catalytic efficiency ( $k_{cat}/K_M$ )  
163 of  $(9.0 \pm 0.4) 10^{-3}$  pmol  $\mu\text{M}^{-2}$  min $^{-1}$  for this substrate (Fig. 2B). By comparison, the phosphorylation  
164 of OdhI by *CgPknG* was approximately 3-fold higher than for the 17-mer peptide even though a *ca.*  
165 15-fold lower concentration of OdhI was used (Fig. 2A and Fig. 2C), indicating a *ca.* 45-fold higher  
166 activity towards OdhI due to the FHA domain acting as a kinase docking site.

167           Finally, we tested the kinase activity of a *CgPknG* deletion mutant lacking residues 1-129 and  
168 434-822. *CgPknG* $_{\Delta 1-129, \Delta 434-822}$  displayed a *ca.* 7-fold lower activity against OdhI compared to the  
169 full-length enzyme, whereas phosphorylation of the 17-mer substrate was unaffected (Fig. 2A and  
170 Fig. 2C). These results indicate that neither residues 1-129 within the N-terminal extension, nor  
171 the TPR domain of *CgPknG* had an effect on the intrinsic kinase activity, supporting previous  
172 evidence for *MtbPknG* (13) that both regions contribute to stabilize the enzyme-FHA substrate  
173 complex.

174           Overall, our results indicate that diverse PknG isoforms recruit the FHA substrate OdhI (or  
175 GarA) *via* a conserved phosphorylation-dependent mechanism.

176

### 177 **A conserved overall topology**

178           To investigate the structural basis of the regulation of a PknG isoform lacking an Rdx domain,  
179 we solved a high-resolution crystal structure of *CgPknG* $_{\Delta N-t}$  (see below) in complex with the non-

180 hydrolysable ATP analog AMP-PNP (Table 1). The final atomic model contains two copies of  
181 *CgPknG* within the asymmetric unit, encompassing residues 123-799 and 125-798, respectively,  
182 including a short fragment of the N-terminal segment (hence the name *CgPknG*<sub>ΔN-t</sub>), the kinase  
183 catalytic core and the TPR domain (Fig. 3 and Fig. S5A). The protein is monomeric, consistent with  
184 analytical ultracentrifugation that did not provide evidence in favor of *CgPknG* dimerization (Fig.  
185 S5B), similar to previous results for *MtbPknG* (13). Additionally, *mFo-DFc* sigma-A-weighted  
186 electron density maps clearly revealed the bound nucleotide and two Mg(II) atoms at the active  
187 site of each *CgPknG* molecule. Notably, even though we used full-length *CgPknG* in our  
188 crystallization assays, we found no evidence for residues 1-122 in electron density maps. Edman  
189 degradation experiments revealed that the N-terminal residue of crystallized *CgPknG* was Val123,  
190 suggesting that the kinase N-terminal segment was partially degraded during crystal growth and  
191 that, as similarly reported for *MtbPknG* (12), it is probably unstructured in most of its length.

192 *CgPknG* and *MtbPknG* (12) share the same overall fold and topology, except for the absence  
193 of a regulatory Rdx domain in *CgPknG* that leads to a more accessible active site (Fig. 3A). As  
194 expected, kinase domain residues or motifs involved in contacts with the Rdx domain in *MtbPknG*  
195 (12, 13) adopt distinct conformations in *CgPknG* (Fig. 3B). Residue Trp188 in *CgPknG* (equivalent to  
196 Trp164 in *MtbPknG*), located in the β<sub>2</sub> strand and adjacent to the G-rich loop, interacts with the N-  
197 terminal segment. The loop connecting strands β<sub>4</sub> and β<sub>5</sub> (loop β<sub>4</sub>-β<sub>5</sub>) is found in *CgPknG* in close  
198 association with the kinase N-lobe, with residue Val246 (His223 in *MtbPknG*) buried within a  
199 pocket and residues Asp243 and Arg245 in contact with the strand β<sub>0</sub>. Besides, the helix α<sub>C</sub> does  
200 not interact with strands β<sub>4</sub> and β<sub>5</sub> and its C-terminal tip is displaced, in *CgPknG* compared to  
201 *MtbPknG*, towards the kinase activation loop.

202           Regardless of these differences, nucleotide binding within the active site of *CgPknG* parallels  
203 the previous description for *MtbPknG* (13) (Fig. 3C), consistent with a conserved set of residues  
204 within the ATP binding site region of the kinase. Also similar to *MtbPknG* (12, 13), most  
205 functionally important and conserved motifs in the active site of *CgPknG* exhibit conformations  
206 compatible with a standard eukaryotic protein kinase active state, and the activation loop is  
207 stabilized in an open and extended conformation, permissive for substrate binding in the absence  
208 of phosphorylation (Fig. 3D). Nevertheless, *CgPknG* residue Glu222 is found away from the  
209 catalytic Lys205, pointing out of the active site due to an outward conformation of the helix  $\alpha$ C, as  
210 previously reported for *MtbPknG* (12, 13).

211           Compared to *MtbPknG*, *CgPknG* contains an additional motif (residues 604-661) in the TPR  
212 domain, adjacent to the catalytic core (Fig. 1 and Fig. 3A). However, a *CgPknG* truncation mutant  
213 lacking residues 604-661 did complement the growth defect of *C. glutamicum*  $\Delta$ *pknG* on glutamine,  
214 suggesting that this motif is not crucial for the kinase function.

215

### 216 **A conserved motif connects the N-terminal segment and the TPR domain**

217           The TPR domain of *MtbPknG* influences the FHA substrate selectivity and we have previously  
218 proposed that this depends on the stabilization of a  $\beta$ -hairpin in the N-terminal extension of the  
219 kinase (13). In spite of sequence divergence, this secondary structure motif is conserved in *CgPknG*  
220 (Fig. 4A). Both in *CgPknG* and *MtbPknG* the N-terminal  $\beta$ -hairpin is stabilized by interactions with  
221 the catalytic core and the linker between this and the TPR domain (linker C-T, see also Figs. 1A and  
222 3A). Notably, the linker C-T simultaneously contacts the N-terminal segment, the catalytic core  
223 and the TPR domain of the kinase. To explore the significance of such interactions, we solved the

224 high-resolution crystal structures of the truncation mutant *CgPknG*<sub>Δ1-129,Δ434-822</sub> in two different  
225 isoforms (Table 1). According to the electron density maps, the N-terminal β-hairpin was not  
226 stabilized in any of the structures of *CgPknG*<sub>Δ1-129,Δ434-822</sub> (Fig. 4B), suggesting that this motif is  
227 responsive to the C-terminal region of the kinase. These results indicate that the linker C-T  
228 physically connects the conserved N- and C-terminal regions flanking the kinase catalytic core.

229

## 230 DISCUSSION

231 The phosphorylation-dependent stabilization of enzyme-substrate complexes is a  
232 widespread mechanism among STPKs that enables the efficient phosphorylation of specific cellular  
233 targets (18). PknG controls metabolism in corynebacteria and mycobacteria by modulating the  
234 phosphorylation status of the FHA regulator OdhI (or GarA) (2, 9), a task that requires the N-  
235 terminal extension of the kinase. Despite the relatively high sequence divergence of this segment,  
236 it has a roughly conserved distribution of charged amino acids, Pro and Gly residues in diverse  
237 species (Fig. S3), and comprises auto-phosphorylation sites both in *CgPknG* and in *MtbPknG* (3)  
238 (Fig. S3 and Fig. S4). The N-terminal extension of PknG is dispensable for the phosphorylation of a  
239 surrogate peptide lacking an FHA domain (Fig. 2C and (13)) and, conversely, the presence of the  
240 FHA domain in OdhI or GarA enables a much more efficient phosphorylation by full-length PknG  
241 (Fig. 2A, Fig. 2C and (13)). Overall, our results support a conserved phosphorylation-dependent  
242 mechanism for the recruitment of the FHA substrate *via* the kinase N-terminal extension.

243 Kinase domain motifs that play regulatory roles in eukaryotic protein kinases (ePKs) adopt  
244 different conformations in PknG isoforms depending on the presence or the absence of an Rdx  
245 domain. In *CgPknG* the loop β4-β5 fills the pocket formed by the β-sheet in the kinase N-lobe,

246 whereas this loop is exposed to the solvent in *MtbPknG* (12, 13) (Fig. 3B). The pocket and the  
247 motifs that may fill it (*i.e.*, the N-lobe cap) lay on top of the catalytic Lys and are features  
248 associated with the regulation of ePKs (19). Besides, the helix  $\alpha$ C, an important regulatory motif in  
249 ePKs (20, 21), is displaced in *CgPknG* towards the kinase activation loop when compared to  
250 *MtbPknG* (12, 13) (Fig. 3B). Consistent with previous findings for ePKs (22), the crystal structures  
251 of both *CgPknG* and *MtbPknG* (12, 13) exhibit relatively high B-factors for the loop  $\beta$ 3- $\alpha$ C and the  
252 N-terminal end of the helix  $\alpha$ C, indicating that this motif is highly dynamic. Interestingly, while the  
253 Rdx domain in *MtbPknG* restrains the position of the helix  $\alpha$ C by interacting with the loop  $\beta$ 3- $\alpha$ C  
254 (12, 13), the position adopted by the helix  $\alpha$ C in *CgPknG* generates a pocket that is reminiscent of  
255 the PIF-pocket in AGC kinases (22, 23) (Fig. S6). However, irrespective of the structural differences  
256 noted between *CgPknG* and *MtbPknG* (13), in both kinase isoforms the ATP phosphates are  
257 properly positioned in the active site despite the absence of a salt bridge between the conserved  
258 Glu in the helix  $\alpha$ C and the catalytic Lys, while other conserved catalytically relevant motifs exhibit  
259 conformations compatible with an ePK active state (20) (Fig. 3C and Fig. 3D). Thus far, there is no  
260 evidence revealing regulatory mechanisms that depend exclusively on motifs within the kinase  
261 catalytic domain. The Rdx module of *MtbPknG* (absent in *CgPknG*) remains the sole regulatory  
262 element known to modulate the intrinsic activity of PknG (13, 15). It is worth noting that Rdx-  
263 mediated regulation appears to act independently of the modulation of substrate specificity by  
264 FHA-mediated docking interactions.

265 As the assembly of new domain combinations into complex proteins is linked to speciation  
266 and segregation into distinct phylogenetic groups (24, 25), we performed a phylogenetic analysis  
267 of PknG orthologs to seek for hints about the PknG-Rdx association (Fig. S7). In line with such

268 notion, PknG orthologs, distinguished by their unique domain organization, are broadly distributed  
269 within *Actinobacteria* and also mostly restricted to this bacterial phylum. A homologue of  
270 *MtbPknG* is, however, found in *Ktedonobacter racemifer*. This Gram-positive spore-forming  
271 bacterium belongs to *Chloroflexi* and grows in filamentous colonies similarly to a number of  
272 actinobacteria (26). *Chloroflexi* is an ancient phylum proposed to be at or very close to the root of  
273 the bacterial phylogenetic tree (27). Besides, a readily detectable homologue of PknG from *K.*  
274 *racemifer* is that from *Calothrix* sp. from the ancient phylum *Cyanobacteria*. The fact that both of  
275 these PknG homologues harbor an Rdx domain (defined by the presence of a PknG\_rubred Pfam  
276 PF16919 domain or two CxxCG motifs) suggests that such domain architecture either preceded  
277 the evolution of *Actinobacteria*, being then differentially lost in some lineages, or that the gene of  
278 an Rdx-containing PknG homolog was horizontally transferred to *Chloroflexi* and *Cyanobacteria*.  
279 We favor the former, more parsimonious hypothesis because several non-actinobacterial ancient  
280 sequences include an Rdx domain whereas the genus *Corynebacterium* lacks the module. It  
281 remains enigmatic why the Rdx domain was lost in evolution in this genus.

282         The overall topology of PknG is conserved irrespective of the presence or the absence of an  
283 Rdx domain (Fig. 3A). The relative position of the TPR and the catalytic domain of *CgPknG* is similar  
284 to that of *MtbPknG* (12). Compared to the mycobacterial isoform, *CgPknG* contains an additional,  
285 intriguing motif (residues 604-661) in the TPR domain (Fig. 1A and Fig. 3A) that increases its  
286 interface with the catalytic core. However, according to our *in vivo* tests, such motif is not  
287 essential for the role of *CgPknG* in metabolic homeostasis (Fig. 1B). In contrast, the C-terminal  
288 region of *CgPknG* (residues 433-822) was required for complementing the *C. glutamicum*  $\Delta pknG$   
289 mutant strain (Fig. 1B), replicating previous results for *MtbPknG* (11) and pointing to a conserved

290 role of the TPR domain in signal transduction. Notably, in *CgPknG* as in *MtbPknG* the linker C-T  
291 bridges the N-terminal segment and the TPR domain (Fig. 4A and (12)), both regions involved in  
292 the regulation of the kinase selectivity for the FHA substrate (13). The linker C-T is stabilized by  
293 conserved interactions with residues along the concave surface of the TPR domain (Fig. 3A and  
294 (12)). According to a recent proposal (11), this surface might constitute a binding site for GlnX, so  
295 that the transduction of extracellular stimuli would imply a conformational change of the linker C-  
296 T from its position in the free form of the kinase.

297 Taking together the available evidence, we propose that the TPR domain of PknG functions  
298 as a localization scaffold that, by mediating an interaction between the kinase and the  
299 transmembrane protein GlnX, transduces a signal about amino acid availability detected by GlnH  
300 (Fig. 5). The PknG-GlnX interaction likely produces a conformational change in the linker C-T,  
301 which couples the detection of the signal to the specific recruitment of the FHA substrate *via* the  
302 N-terminal segment of the kinase. Given that the specific set of multidomain proteins in genomes  
303 sets constraint on the topology of pathways and networks that carry out regulatory processes (28),  
304 the co-occurrence of *pknG*, *glnX*, *glnH* and *odhI* in actinobacteria (2, 11), together with the  
305 functional links found among the respective proteins, therefore suggests the conservation of the  
306 associated molecular mechanism that evolved in this phylum to control metabolism in response to  
307 nutrient availability.

308

## 309 **MATERIALS AND METHODS**

### 310 **Complementation assays**

311 All plasmids used in this study are listed in **Table 2**. Plasmids for complementation assays  
312 were generated by Genscript (Leiden, The Netherlands) from the previously described pEKEx2-  
313 *pknG<sub>st</sub>* template plasmid (2). The *C. glutamicum*  $\Delta pknG$  strain (2) was transformed with each of the  
314 plasmids carrying the relevant *pknG* variants, or with the pEKEx2 vector lacking an insert, as  
315 previously described (29). Then, strains were first streaked on BHI medium (BD BBL). In each case,  
316 single colonies were subsequently plated both on CGXII-glucose (30) and CGXII-glutamine. The  
317 CGXII-glutamine broth is a modified version of medium CGXII that is devoid of  $(\text{NH}_4)_2\text{SO}_4$ , urea and  
318 glucose and is supplemented with 100 mM glutamine. Plates were cultivated for 3 days at 30°C.

319

#### 320 **Detection of PknG versions by Western-blot**

321 Transformed *C. glutamicum*  $\Delta pknG$  (2) cells were grown at 30°C in BHI broth (BD BBL) with  
322 agitation until reaching 3 units of optical density at 600 nm. Protein expression was then induced  
323 by adding isopropyl  $\beta$ -D-1-thiogalactopyranoside (IPTG) to a final concentration of 1 mM, and the  
324 incubation was continued for 20 hours at 30°C. Cells were then harvested by centrifugation. Cell  
325 pellets were suspended in lysis buffer (50 mM Bis-Tris, 75 mM 6-aminocaproic acid, 1 mM  $\text{MgSO}_4$ ,  
326 1 U/ml benzonase, cOmplete EDTA-free protease inhibitor cocktail (Roche) in the amount  
327 specified by the manufacturer, pH 7.4) and disrupted by using 0.1 mm glass beads and a  
328 homogenizer (Precellys 24) operated at 4°C. 120-250  $\mu\text{g}$  of crude extracts were run in a pre-cast 4-  
329 12% SDS-PAGE gradient gel (Biorad) and then electro-transferred onto a 0.2  $\mu\text{m}$  nitrocellulose  
330 membrane (Biorad). Blocking was performed with PBS buffer supplemented with 3% w/v BSA and  
331 0.05% v/v Tween 20. The membrane was subsequently incubated with an anti-Strep antibody  
332 (StrepMAB-Classic, IBA Lifesciences) at 4°C overnight. After 3 washes with TBS-Tween buffer (10



333 mM Tris-HCl, 150 mM NaCl, 0.05 v/v Tween 20, pH 8.0) for 5 minutes each, the membrane was  
334 incubated with a secondary anti-Rabbit horseradish peroxidase conjugated antibody (GE  
335 Healthcare) for 45 minutes at room temperature. Finally, the membrane was washed 3 times with  
336 TBS-Tween buffer for 5 min each, revealed with the horseradish peroxidase substrate (Immobilon  
337 Forte, Millipore) and imaged using the ChemiDoc MP Imaging System (Biorad).

338

### 339 **Construction of plasmids for the production of recombinant proteins**

340 Plasmids pET28a-CgPknG and pET28a-CgPknG<sub>Δ1-129,Δ434-822</sub> (Table 2) were constructed by PCR  
341 amplification of *pknG* regions 1-822 and 130-433, respectively, from *C. glutamicum* ATCC 13032  
342 genomic DNA, followed by digestion and ligation of the amplification products into the *NdeI* and  
343 *SacI* sites in plasmid pET28a (Novagen). The oligonucleotides employed were the following (the  
344 TEV protease cleavage sites are underlined):

345 CgPknG-F: ATTATCATATGGGAGAATCTTTATTTTCAGGGCATGAAGGATAATGAAGATTTTCGATCC

346 CgPknG-R: ATATTGAGCTCTCACTAGAACCAACTCAGTGGCCGCACGGC

347 Δ1-129,Δ434-822-F:

348 TATATTATCATATGGGAGAATCTTTATTTTCAGGGCGTTGCTGATGGCATGGTGGGAATTG

349 Δ1-129,Δ434-822-R: TATATATTGAGCTCTCATTTGCCGTCGCGGACTGCCAAAATTTTC

350

### 351 **Protein production and purification**

352 Wild type CgPknG and the truncation mutant CgPknG<sub>Δ1-129,Δ434-822</sub> were both overproduced  
353 in *E. coli* BL21(DE3) cells cultivated in LB broth. Wild type CgPknG was produced for 18 h at 15°C  
354 with 500 μM IPTG, whereas CgPknG<sub>Δ1-129,Δ434-822</sub> was expressed after 3 h of induction at 30°C with

355 250  $\mu$ M IPTG. Both of these proteins were then purified following the same protocol. *E. coli* cells  
356 were harvested by centrifugation, re-suspended in lysis buffer (25 mM Hepes, 500 mM NaCl, 20%  
357 v/v glycerol, 20 mM imidazole, pH 8.0), supplemented with cOmplete EDTA-free protease inhibitor  
358 cocktail (Roche) as specified by the manufacturer and sonicated. After clarification by  
359 centrifugation, the supernatant was loaded onto a HisTrap HP column (GE Healthcare) and the His-  
360 tagged protein was purified applying a linear imidazole gradient (20–500 mM) in lysis buffer. The  
361 His6-tag was later removed by over-night incubation at 4°C with 0.2 equivalents of His6-tagged  
362 TEV protease, followed by separation on a Ni-NTA agarose column (Qiagen). The protein was then  
363 further purified by size-exclusion chromatography on a 16/600 Superdex 200 column (GE  
364 Healthcare) equilibrated in either 50 mM Tris-HCl, 250 mM NaCl, 5% glycerol, pH 8.0 (wild type  
365 *CgPknG*) or 25 mM Hepes, 150 mM NaCl, 5% glycerol, pH 7.5 (*CgPknG* <sub>$\Delta$ 1-129, $\Delta$ 434-822</sub>), using a flow  
366 rate of 0.5-1 ml/min. Fractions corresponding to *CgPknG* or *CgPknG* <sub>$\Delta$ 1-129, $\Delta$ 434-822</sub>, as confirmed by  
367 SDS-PAGE, were pooled and concentrated, flash-frozen in liquid nitrogen and stored at -80°C.

368 GarA and OdhI were prepared as previously described (17, 31).

369 Proteins were quantified by using the molar absorption coefficient predicted from the  
370 aminoacid sequence by the ProtParam tool (<http://web.expasy.org/protparam/>).

371

### 372 **Protein kinase activity assays**

373 Kinase activity assays were performed in 96-well plates. Each activity measurement was  
374 performed in a final volume of 20  $\mu$ l, containing 50 mM Tris-HCl pH 7.4, 0.1% v/v 2-  
375 mercaptoethanol, 10 mM MnCl<sub>2</sub>, 100  $\mu$ M [ $\gamma$ -<sup>32</sup>P]ATP (5-50 cpm/pmol), and 330  $\mu$ M 17-mer peptide  
376 or 25  $\mu$ M OdhI (or GarA) as substrate. The enzyme concentration in the assays was 0.7-3  $\mu$ M and

377 0.15-0.9  $\mu$ M when using the 17-mer peptide or OdhI (or GarA) as substrates, respectively. The  
378 kinase reactions were started by the addition of 4  $\mu$ l [ $\gamma$ - $^{32}$ P]ATP-Mn $^{+2}$  and were performed at room  
379 temperature. The reactions were stopped by the addition of phosphoric acid and 4  $\mu$ l of each  
380 reaction were spotted on P81 phosphocellulose papers (Whatman) using the epMotion 5070  
381 (Eppendorf) workstation. The papers were washed in 0.01% phosphoric acid, dried, then  
382 measured and analyzed using the PhosphorImager (FLA-9000 Starion, Fujifilm). Each reaction was  
383 performed in duplicates (<5% variation). In all cases, specific activity values were derived from  
384 reactions performed employing three different enzyme concentrations within the indicated ranges  
385 (<10% variation), verifying a linear dependence of activity with the enzyme concentration. Each  
386 assay was performed at least twice. The proportion of 17-mer peptide or OdhI (or GarA)  
387 phosphorylated in the reactions was lower than 10% and 30%, respectively. OdhI (or GarA)  
388 phosphorylation was verified to be linear in time up to 50% of its initial concentration. Under the  
389 experimental conditions employed to test phosphorylation of the 17-mer peptide or OdhI (or  
390 GarA), *CgPknG* auto-phosphorylation represented less than 5% of the total signal. The measured  
391 signal was at least five times higher than the measure on the background.

392 The 17-mer peptide SDEVT**VE**TTSVFRADFL was produced with a purity >98% by Thermo  
393 Fisher Scientific.

394

### 395 **Mass spectrometry analysis**

396 The kinase activity of *CgPknG* was assayed using GarA as substrate and the molecular mass  
397 of unphosphorylated and phosphorylated GarA was then determined as previously described (15).

398 *CgPknG* was incubated with ATP and MnCl<sub>2</sub> and then sequentially digested with trypsin and  
399 endoproteinase GluC for 3 h at 37°C. The resulting peptides were separated using a nano-HPLC  
400 system (Proxeon EasynLC, Thermo) with a reverse-phase column (easy C18 column, 3 μm; 75 μm  
401 ID×10 cm; Proxeon, Thermo) and eluted with a 0.1% v/v formic acid (in water) to acetonitrile  
402 gradient (0–40% acetonitrile in 50 min; flow 300 nl/min). Online MS analysis was carried out in a  
403 linear ion trap instrument (LTQ Velos,Thermo) in data dependent acquisition mode (full scan  
404 followed by MS/MS of the top 5 peaks in each segment, using a dynamic exclusion list). Raw  
405 MS/MS spectra were extracted by the Proteome Discoverer software package (v.1.3.0.339,  
406 Thermo) and submitted to Sequest for database searching against sequences from *E. coli* (strain  
407 K12) downloaded from Uniprot consortium (April, 2021) to which the sequence of PknG from *C.*  
408 *glutamicum* was added. Search parameters were set as follows: peptide tolerance: 0.8 Da; MS/MS  
409 tolerance: 0.8 Da; methionine oxidation and Ser/Thr/Tyr phosphorylation as the allowed variable  
410 modifications. PhosphoRS was used as phospho-site localization tool (32). We considered a  
411 positive phospho-site identification when more than one spectrum for the phospho-peptide was  
412 obtained, pRS probability was >95% and manual inspection of the MS/MS spectra showed at least  
413 two confirmatory fragment ions.

414

#### 415 **Crystallization and data collection**

416 Crystallization screenings were carried out using the sitting-drop vapor diffusion method and  
417 a Mosquito nanolitre-dispensing crystallization robot (TTP Labtech). Crystals of *CgPknG*<sub>ΔN-t</sub> + AMP-  
418 PNP and *CgPknG*<sub>Δ1-129,Δ434-822</sub> + AMP-PNP grew after 20-30 and 7-10 days, respectively, from 10  
419 mg/ml protein solutions supplemented with 5 mM AMP-PNP, by mixing 200 nl of protein solution

420 and 200 nl of mother liquor (100 mM Tris-HCl, 17% w/v PEG 20 k, 100 mM MgCl<sub>2</sub>, pH 8.5; and 100  
421 mM Tris-HCl, 27-30% w/v PEG 4 k, 200 mM MgCl<sub>2</sub>, pH 8.8, respectively), at 18°C. Single crystals  
422 reaching a size of (100 μm)<sup>3</sup> were cryoprotected in mother liquor containing 25% glycerol and flash-  
423 frozen in liquid nitrogen. X-ray diffraction data were collected at the synchrotron beamlines  
424 Proxima 2 (Synchrotron Soleil, Saint-Aubin, France) and ID29 (ESRF, Grenoble, France) at 100 K.  
425 Employed wavelengths were 0.9801 Å and 0.97625 Å for *CgPknG*<sub>ΔN-t</sub> + AMP-PNP and *CgPknG*<sub>Δ1-  
426 129,Δ434-822</sub> + AMP-PNP crystals, respectively. The diffraction data were processed using XDS (33)  
427 and scaled with Aimless (34) from the CCP4 program suite.

428

#### 429 **Structure determination and refinement**

430 The crystal structure of *CgPknG*<sub>ΔN-t</sub> + AMP-PNP was solved by molecular replacement using  
431 the program Phaser (35) and the atomic coordinates of *MtbPknG* residues 138-405 from PDB 4Y0X  
432 (13) and residues 406-750 from PDB 2PZI (12) as search probes. The structures of *CgPknG*<sub>Δ1-129,Δ434-  
433 822</sub> + AMP-PNP were solved similarly by using the atomic coordinates of *CgPknG*<sub>ΔN-t</sub> residues 165-  
434 425. Ligand molecules were manually placed in *mFo*-*DFc* sigma-A-weighted electron density maps  
435 employing *Coot* (36). Models were refined through iterative cycles of manual model building with  
436 *Coot* and reciprocal space refinement with phenix.refine (37). The final models were validated  
437 through the MolProbity server (38). In each case, the final model contained more than 97% of  
438 residues within favored regions of the Ramachandran plot, with no outliers. Figures were  
439 generated and rendered with Pymol 1.8.x. (Schrödinger, LLC).

440

#### 441 **Edman degradation**

442 The crystal employed to solve the structure of *CgPknG*<sub>ΔN-t</sub> was dissolved in water and Edman  
443 degradation was performed by the Functional Genomics Center of Zurich  
444 ([https://fgcz.ch/omics\\_areas/prot/applications/protein-characterization.html](https://fgcz.ch/omics_areas/prot/applications/protein-characterization.html)). As a control, an  
445 aliquot of recombinant *CgPknG* as used in crystallization screenings was also analyzed, and the  
446 sequence of the protein N-terminus resulted GMKDN, as expected.

447

#### 448 **Analytical ultracentrifugation**

449 Sedimentation velocity experiments were carried out at 20°C in an XL-I analytical  
450 ultracentrifuge (Beckman Coulter). Samples were spun using an An60Ti rotor and 12-mm double  
451 sector epoxy centerpieces. The partial specific volume of *CgPknG* (0.734 ml g<sup>-1</sup>) was estimated  
452 from their amino acid sequences using the software Sednterp. The same software was used to  
453 estimate the buffer viscosity ( $\eta = 1.040$  centipoises) and density ( $\rho = 1.010$  g·ml<sup>-1</sup>). *CgPknG* (400  $\mu$ l  
454 at 1 mg/ml) was spun at 42,000 rpm, and absorbance profiles were recorded every five minutes.  
455 Sedimentation coefficient distributions,  $c(s)$ , were determined using the software Sedfit 14.1 (39).

456

#### 457 **Database searches, alignments and phylogenetic analyses**

458 BLASTp searches (40) were conducted against complete protein sequences available at the  
459 Integrated Microbial Genome (IMG; <http://img.jgi.doe.gov>) (41), performing a taxon sampling on  
460 finished assembled genomes within the phyla *Cyanobacteria*, *Chloroflexi*, *Chlorobi*, *Fusobacteria*,  
461 *Sinergistetes*, *Firmicutes*, *Tenericutes*, *Acidobacteria*, *Nitrospirae*, *Spirochaetes*, *Aquificae* and  
462 *Thermotogae*, all in the vicinity of *Actinobacteria* in an updated tree of life (27). The sequence of  
463 *MtbPknG* was used as queries for searches to identify homologues in such genomes using an

464 expected inclusion threshold e-value  $< 1 e^{-20}$ . Once the existence of the domain combinations was  
465 confirmed, we focused on 91 complete *Actinobacteria* genomes available from IMG (April 2021).  
466 The final selection was preprocessed using PREQUAL (42) to mask non-homologous sequence  
467 stretches. A CD-HIT (43) cut-off value of 90% pairwise identity was applied for the entire set of  
468 sequences retrieved as described. The final set of 40 sequences was aligned with MAFFT (version  
469 7.467) using the L-INS-I strategy (44) and columns with more than 90% gaps were removed with  
470 TrimAL. The phylogenetic tree displayed in Fig. S7 was computed with IQ-TREE (version 1.6.12,  
471 (45)) using ModelFinder (46) to select the evolutionary model and the ultrafast bootstrap method  
472 (47) (options “-bb 1000 -alrt 1000”). The model selected with the Bayesian Information Criterion  
473 was the evolutionary matrix EX\_EHO (48) with empirical frequencies and four categories of free  
474 rate (EX\_EHO+F+R4).

475

#### 476 **Data availability**

477 Atomic coordinates and structure factors have been deposited in the Protein Data Bank  
478 under the accession codes 7mxb (*CgPknG<sub>ΔN-t</sub>* + AMP-PNP), 7mxj (*CgPknG<sub>Δ1-129,Δ434-822</sub>* + AMP-PNP\_1)  
479 and 7mxk (*CgPknG<sub>Δ1-129,Δ434-822</sub>* + AMP-PNP\_2).

480

#### 481 **ACKNOWLEDGEMENTS**

482 MNL received fellowships from the EMBO (European Molecular Biology Organization) and  
483 the Fondation pour la Recherche Médicale (FRM, France). This work was funded by grants from  
484 the Institut Pasteur, the CNRS (France), the Agence Nationale de la Recherche (ANR, France,  
485 contract number ANR-09-BLAN-0400) and the European Commission Seventh Framework

486 Programme (contract HEALTH-F3-2011-260872). MNL acknowledges support from the Agencia  
487 I+D+I (grant PICT 2017-1932). RMB acknowledges support from DFG (grant BI 1044/12-1).

488 We thank Ahmed Haouz and Patrick Weber for their help with robot-driven crystallization  
489 screenings and Bertrand Raynal for his help with analytical ultracentrifugation experiments. We  
490 acknowledge William Shepard for his assistance in the collection of diffraction data at beamline  
491 Proxima 2 and Martin Cohen-Gonsaud for providing plasmid pET-15b-Tev-OdhI for OdhI  
492 production.

493 Author contributions: MNL designed experiments, prepared proteins, performed kinase  
494 activity assays, carried out crystallographic studies and structural analysis, analyzed data and  
495 wrote the paper; ASC performed complementation assays, analyzed data and wrote the paper; NB  
496 prepared plasmids pET28a-CgPknG and pET28a-CgPknG $\Delta_{1-129,\Delta_{434-822}}$ , optimized the production of  
497 recombinant proteins and performed analytical ultracentrifugation experiments; MG<sub>i</sub> carried out  
498 mass spectrometry analyses; MG<sub>a</sub> performed phylogenetic analysis; RD designed and performed  
499 mass spectrometry studies; RMB designed kinase activity assays and analyzed data; MBe, MBo  
500 and PMA designed research and analyzed data. All authors copy edited the paper.

501

## 502 REFERENCES

- 503 1. Barka EA, Vatsa P, Sanchez L, Gaveau-vaillant N, Jacquard C, Klenk H-P, Clément C,  
504 Ouhdouch Y, van Wezel GP. 2016. Taxonomy, Physiology, and Natural Products of  
505 Actinobacteria. *Microbiol Mol Biol Rev* 80:1–43.
- 506 2. Niebisch A, Kabus A, Schultz C, Weil B, Bott M. 2006. Corynebacterial protein kinase G  
507 controls 2-oxoglutarate dehydrogenase activity via the phosphorylation status of the OdhI



- 508 protein. *J Biol Chem* 281:12300–12307.
- 509 3. O’Hare HM, Durán R, Cerveñansky C, Bellinzoni M, Wehenkel AM, Pritsch O, Obal G,  
510 Baumgartner J, Vialaret J, Johnsson K, Alzari PM. 2008. Regulation of glutamate metabolism  
511 by protein kinases in mycobacteria. *Mol Microbiol* 70:1408–1423.
- 512 4. Nott TJ, Kelly G, Stach L, Li J, Westcott S, Patel D, Hunt DM, Howell S, Buxton RS, O’Hare HM,  
513 Smerdon SJ. 2009. An Intramolecular Switch Regulates Phosphoindependent FHA Domain  
514 Interactions in *Mycobacterium tuberculosis*. *Sci Signal* 2:ra12.
- 515 5. Ventura M, Rieck B, Boldrin F, Degiacomi G, Bellinzoni M, Barilone N, Alzaidi F, Alzari PM,  
516 Manganeli R, O’Hare HM. 2013. GarA is an essential regulator of metabolism in  
517 *mycobacterium tuberculosis*. *Mol Microbiol* 90:356–366.
- 518 6. Krawczyk S, Raasch K, Schultz C, Hoffelder M, Eggeling L, Bott M. 2010. The FHA domain of  
519 OdhI interacts with the carboxyterminal 2-oxoglutarate dehydrogenase domain of OdhA in  
520 *Corynebacterium glutamicum*. *FEBS Lett* 584:1463–1468.
- 521 7. Wagner T, André-Leroux G, Hindie V, Barilone N, Lisa M, Hoos S, Raynal B, Vulliez-Le  
522 Normand B, O’Hare HM, Bellinzoni M, Alzari PM. 2019. Structural insights into the  
523 functional versatility of an FHA domain protein in mycobacterial signaling. *Sci Signal*  
524 12:eaav9504.
- 525 8. Cowley S, Ko M, Pick N, Chow R, Downing KJ, Gordhan BG, Betts JC, Mizrahi V, Smith DA,  
526 Stokes RW, Av-Gay Y. 2004. The *Mycobacterium tuberculosis* protein serine/threonine  
527 kinase PknG is linked to cellular glutamate/glutamine levels and is important for growth in  
528 vivo. *Mol Microbiol* 52:1691–1702.
- 529 9. Rieck B, Degiacomi G, Zimmermann M, Cascioferro A, Boldrin F, Lazar-Adler NR, Bottrill AR,

- 530 le Chevalier F, Frigui W, Bellinzoni M, Lisa M-N, Alzari PM, Nguyen L, Brosch R, Sauer U,  
531 Manganelli R, O'Hare HM. 2017. PknG senses amino acid availability to control metabolism  
532 and virulence of *Mycobacterium tuberculosis*. *PLoS Pathog* 13:e1006399.
- 533 10. York A. 2017. Bacterial physiology: An inside job on metabolism. *Nat Rev Microbiol* 15:383–  
534 383.
- 535 11. Bhattacharyya N, Nkumama IN, Newland-Smith Z, Lin LY, Yin W, Cullen RE, Griffiths JS, Jarvis  
536 AR, Price MJ, Chong PY, Wallis R, O'Hare HM. 2018. An aspartate-specific solute-binding  
537 protein regulates protein kinase G activity to control glutamate metabolism in mycobacteria.  
538 *MBio* 9:1–13.
- 539 12. Scherr N, Honnappa S, Kunz G, Mueller P, Jayachandran R, Winkler F, Pieters J, Steinmetz  
540 MO. 2007. Structural basis for the specific inhibition of protein kinase G, a virulence factor  
541 of *Mycobacterium tuberculosis*. *Proc Natl Acad Sci U S A* 104:12151–12156.
- 542 13. Lisa M-N, Gil M, André-Leroux G, Barilone N, Durán R, Biondi RM, Alzari PM. 2015.  
543 Molecular Basis of the Activity and the Regulation of the Eukaryotic-like S/T Protein Kinase  
544 PknG from *Mycobacterium tuberculosis*. *Structure* 23:1039–1048.
- 545 14. Reckel S, Hantschel O. 2015. Kinase Regulation in *Mycobacterium tuberculosis*: Variations  
546 on a Theme. *Structure* 23:975–976.
- 547 15. Gil M, Graña M, Schopfer FJ, Wagner T, Denicola A, Freeman BA, Alzari PM, Batthyány C,  
548 Durán R. 2013. Inhibition of *Mycobacterium tuberculosis* PknG by non-catalytic rubredoxin  
549 domain specific modification: Reaction of an electrophilic nitro-fatty acid with the Fe-S  
550 center. *Free Radic Biol Med* 65:150–161.
- 551 16. Zeytuni N, Zarivach R. 2012. Structural and functional discussion of the tetra-trico-peptide

- 552 repeat, a protein interaction module. *Structure* 20:397–405.
- 553 17. Barthe P, Roumestand C, Canova MJ, Kremer L, Hurard C, Molle V, Cohen-Gonsaud M. 2009.
- 554 Dynamic and Structural Characterization of a Bacterial FHA Protein Reveals a New
- 555 Autoinhibition Mechanism. *Structure* 17:568–578.
- 556 18. Jin J, Pawson T. 2012. Modular evolution of phosphorylation-based signalling systems.
- 557 *Philos Trans R Soc B Biol Sci* 367:2540–2555.
- 558 19. Thompson EE, Kornev AP, Kannan N, Kim C, Ten Eyck LF, Taylor SS. 2009. Comparative
- 559 surface geometry of the protein kinase family. *Protein Sci* 18:2016–2026.
- 560 20. Huse M, Kuriyan J. 2002. The conformational plasticity of protein kinases. *Cell* 109:275–282.
- 561 21. Kornev AP, Taylor SS. 2010. Defining the conserved internal architecture of a protein kinase.
- 562 *Biochim Biophys Acta - Proteins Proteomics* 1804:440–444.
- 563 22. Hindie V, Stroba A, Zhang H, Lopez-Garcia LA, Idrissova L, Zeuzem S, Hirschberg D, Schaeffer
- 564 F, Jørgensen TJD, Engel M, Alzari PM, Biondi RM. 2009. Structure and allosteric effects of
- 565 low-molecular-weight activators on the protein kinase PDK1. *Nat Chem Biol* 5:758–764.
- 566 23. Leroux AE, Biondi RM. 2020. Renaissance of Allostery to Disrupt Protein Kinase Interactions.
- 567 *Trends Biochem Sci* 45:27–41.
- 568 24. Vogel C, Bashton M, Kerrison ND, Chothia C, Teichmann SA. 2004. Structure, function and
- 569 evolution of multidomain proteins. *Curr Opin Struct Biol* 14:208–216.
- 570 25. Han JH, Batey S, Nickson AA, Teichmann SA, Clarke J. 2007. The folding and evolution of
- 571 multidomain proteins. *Nat Rev Mol Cell Biol* 8:319–330.
- 572 26. Cavaletti L, Monciardini P, Bamonte R, Schumann P, Ronde M, Sosio M, Donadio S. 2006.
- 573 New lineage of filamentous, spore-forming, gram-positive bacteria from soil. *Appl Environ*

- 574 Microbiol 72:4360–4369.
- 575 27. Castelle CJ, Banfield JF. 2018. Major New Microbial Groups Expand Diversity and Alter our  
576 Understanding of the Tree of Life. *Cell* 172:1181–1197.
- 577 28. Zmasek CM, Godzik A. 2012. This Déjà Vu Feeling-Analysis of Multidomain Protein Evolution  
578 in Eukaryotic Genomes. *PLoS Comput Biol* 8.
- 579 29. van der Rest ME, Lange C, Molenaar D. 1999. A heat shock following electroporation  
580 induces highly efficient transformation of *Corynebacterium glutamicum* with xenogeneic  
581 plasmid DNA. *Appl Microbiol Biotechnol* 52:541–545.
- 582 30. Frunzke J, Engels V, Hasenbein S, Gätgens C, Bott M. 2008. Co-ordinated regulation of  
583 gluconate catabolism and glucose uptake in *Corynebacterium glutamicum* by two  
584 functionally equivalent transcriptional regulators, GntR1 and GntR2. *Mol Microbiol* 67:305–  
585 322.
- 586 31. England P, Wehenkel A, Martins S, Hoos S, André-Leroux G, Villarino A, Alzari PM. 2009. The  
587 FHA-containing protein GarA acts as a phosphorylation-dependent molecular switch in  
588 mycobacterial signaling. *FEBS Lett* 583:301–307.
- 589 32. Taus T, Köcher T, Pichler P, Paschke C, Schmidt A, Henrich C, Mechtler K. 2011. Universal  
590 and Confident Phosphorylation Site Localization Using phosphoRS. *J Proteome Res* 10:5354–  
591 5362.
- 592 33. Kabsch W. 2010. XDS. *Acta Crystallogr Sect D* 66:125–132.
- 593 34. Evans PR, Murshudov GN. 2013. How good are my data and what is the resolution? *Acta*  
594 *Crystallogr Sect D Biol Crystallogr* 69:1204–1214.
- 595 35. McCoy AJ, Grosse-Kunstleve RW, Adams PD, Winn MD, Storoni LC, Read RJ. 2007. Phaser

- 596 crystallographic software. *J Appl Crystallogr* 40:658–674.
- 597 36. Emsley P, Lohkamp B, Scott WG, Cowtan K. 2010. Features and development of Coot. *Acta*  
598 *Crystallogr Sect D Biol Crystallogr* 66:486–501.
- 599 37. Afonine P V., Grosse-Kunstleve RW, Echols N, Headd JJ, Moriarty NW, Mustyakimov M,  
600 Terwilliger TC, Urzhumtsev A, Zwart PH, Adams PD. 2012. Towards automated  
601 crystallographic structure refinement with phenix.refine. *Acta Crystallogr Sect D Biol*  
602 *Crystallogr* 68:352–367.
- 603 38. Williams CJ, Headd JJ, Moriarty NW, Prisant MG, Videau LL, Deis LN, Verma V, Keedy DA,  
604 Hintze BJ, Chen VB, Jain S, Lewis SM, Arendall WB, Snoeyink J, Adams PD, Lovell SC,  
605 Richardson JS, Richardson DC. 2018. MolProbity: More and better reference data for  
606 improved all-atom structure validation. *Protein Sci*.
- 607 39. Schuck P. 2000. Size-distribution analysis of macromolecules by sedimentation velocity  
608 ultracentrifugation and Lamm equation modeling. *Biophys J* 78:1606–1619.
- 609 40. Altschul SF, Madden TL, Schäffer AA, Zhang J, Zhang Z, Miller W, Lipman DJ. 1997. Gapped  
610 BLAST and PSI-BLAST: A new generation of protein database search programs. *Nucleic Acids*  
611 *Res* 25:3389–3402.
- 612 41. Markowitz VM, Chen IMA, Palaniappan K, Chu K, Szeto E, Grechkin Y, Ratner A, Jacob B,  
613 Huang J, Williams P, Huntemann M, Anderson I, Mavromatis K, Ivanova NN, Kyrpides NC.  
614 2012. IMG: The integrated microbial genomes database and comparative analysis system.  
615 *Nucleic Acids Res* 40:D115–D122.
- 616 42. Whelan S, Irisarri I, Burki F. 2018. PREQUAL: detecting non-homologous characters in sets of  
617 unaligned homologous sequences. *Bioinformatics* 34:3929–3930.

- 618 43. Li W, Godzik A. 2006. Cd-hit: A fast program for clustering and comparing large sets of  
619 protein or nucleotide sequences. *Bioinformatics* 22:1658–1659.
- 620 44. Katoh K, Toh H. 2008. Recent developments in the MAFFT multiple sequence alignment  
621 program. *Brief Bioinform* 9:286–298.
- 622 45. Minh BQ, Schmidt HA, Chernomor O, Schrempf D, Woodhams MD, von Haeseler A, Lanfear  
623 R. 2020. IQ-TREE 2: New Models and Efficient Methods for Phylogenetic Inference in the  
624 Genomic Era. *Mol Biol Evol* 37:1530–1534.
- 625 46. Kalyaanamoorthy S, Minh BQ, Wong TKF, Von Haeseler A, Jermiin LS. 2017. ModelFinder:  
626 Fast model selection for accurate phylogenetic estimates. *Nat Methods* 14:587–589.
- 627 47. Hoang DT, Chernomor O, von Haeseler A, Minh BQ, Vinh LS. 2018. UFBoot2: Improving the  
628 Ultrafast Bootstrap Approximation. *Mol Biol Evol* 35:518–522.
- 629 48. Le SQ, Gascuel O. 2010. Accounting for Solvent Accessibility and Secondary Structure in  
630 Protein Phylogenetics Is Clearly Beneficial. *Syst Biol* 59:277–287.
- 631 49. Eikmanns BJ, Kleinertz E, Liebl W, Sahm H. 1991. A family of *Corynebacterium*  
632 *glutamicum*/*Escherichia coli* shuttle vectors for cloning, controlled gene expression, and  
633 promoter probing. *Gene*. 102:93-98.

634

635 **TABLES**

636 **Table 1. Data collection and refinement statistics.**

|                                                     | <i>CgPknG</i> <sub>ΔN-t</sub> | <i>CgPknG</i> <sub>Δ1-129,Δ434-822_1</sub>    | <i>CgPknG</i> <sub>Δ1-129,Δ434-822_2</sub>    |
|-----------------------------------------------------|-------------------------------|-----------------------------------------------|-----------------------------------------------|
| <b>Data collection</b>                              |                               |                                               |                                               |
| Space group                                         | P2 <sub>1</sub>               | P2 <sub>1</sub> 2 <sub>1</sub> 2 <sub>1</sub> | P2 <sub>1</sub> 2 <sub>1</sub> 2 <sub>1</sub> |
| Cell dimensions                                     |                               |                                               |                                               |
| <i>a</i> , <i>b</i> , <i>c</i> (Å)                  | 104.66 42.74 175.33           | 37.62 55.94 123.94                            | 37.81 54.59 146.49                            |
| α, β, γ (°)                                         | 90.00 95.31 90.00             | 90.00 90.00 90.00                             | 90.00 90.00 90.00                             |
| Resolution (Å)                                      | 46.68-2.20 (2.24-2.20)*       | 41.52-1.92 (1.97- 1.92)                       | 48.83-1.99 (2.04-1.99)                        |
| <i>R</i> <sub>merge</sub>                           | 0.086 (0.514)                 | 0.070 (0.746)                                 | 0.067 (0.654)                                 |
| <i>I</i> / <i>σI</i>                                | 9.9 (2.0)                     | 13.6 (1.9)                                    | 17.1 (2.3)                                    |
| CC (1/2)                                            | 0.996 (0.675)                 | 0.999 (0.805)                                 | 0.999 (0.751)                                 |
| Completeness (%)                                    | 99.1 (90.8)                   | 99.9 (100.0)                                  | 98.4 (84.9)                                   |
| Redundancy                                          | 3.4 (2.6)                     | 5.9 (5.6)                                     | 6.0 (5.2)                                     |
| <b>Refinement</b>                                   |                               |                                               |                                               |
| Resolution (Å)                                      | 43.02-2.20                    | 41.52-1.92                                    | 43.77- 1.99                                   |
| No. reflections                                     | 78,937                        | 20,701                                        | 21,183                                        |
| <i>R</i> <sub>work</sub> / <i>R</i> <sub>free</sub> | 0.210/0.246                   | 0.199/0.225                                   | 0.209/0.237                                   |
| No. atoms                                           |                               |                                               |                                               |
| Protein                                             | 10,369                        | 2,190                                         | 2,255                                         |
| Ligands                                             | 68                            | 33                                            | 33                                            |
| Solvent                                             | 910                           | 237                                           | 157                                           |
| Average <i>B</i> -factors                           |                               |                                               |                                               |
| Protein                                             | 37.82                         | 32.46                                         | 47.67                                         |
| Ligands                                             | 24.54                         | 30.19                                         | 33.21                                         |
| Solvent                                             | 38.11                         | 36.72                                         | 42.30                                         |
| R.m.s. deviations                                   |                               |                                               |                                               |
| Bond lengths (Å)                                    | 0.002                         | 0.003                                         | 0.003                                         |
| Bond angles (°)                                     | 0.54                          | 0.63                                          | 0.59                                          |
| Ramachandran                                        |                               |                                               |                                               |
| Favored (%)                                         | 98.17                         | 97.85                                         | 97.57                                         |
| Allowed (%)                                         | 1.83                          | 2.15                                          | 2.43                                          |
| Outliers (%)                                        | 0                             | 0                                             | 0                                             |
| <b>PDB code</b>                                     | 7mxb                          | 7mxj                                          | 7mxk                                          |

637 \*One protein crystal was employed for structure determination in each case. Values in  
638 parentheses are for highest-resolution shell.

639 **Table 2. Plasmids used in this study.**

| Plasmid                                          | Description                                                                                                                                                                                            | Reference |
|--------------------------------------------------|--------------------------------------------------------------------------------------------------------------------------------------------------------------------------------------------------------|-----------|
| pEKEx2                                           | Kan <sup>R</sup> . Allows the IPTG-inducible production of proteins in <i>C. glutamicum</i> .                                                                                                          | (49)      |
| pEKEx2- <i>pknG</i> <sub>St</sub>                | Kan <sup>R</sup> , derived from pEKEx2. Designed for the production in <i>C. glutamicum</i> of C-terminally Strep-tagged full-length <i>CgPknG</i> from the endogenous gene promoter.                  | (2)       |
| pEKEx2- <i>CgPknG</i> <sub>K205A</sub>           | Kan <sup>R</sup> , derived from pEKEx2- <i>pknG</i> <sub>St</sub> . Used for the production in <i>C. glutamicum</i> of C-terminally Strep-tagged full-length <i>CgPknG</i> carrying substitution K205. | This work |
| pEKEx2- <i>CgPknG</i> <sub>Δ433-822</sub>        | Kan <sup>R</sup> , derived from pEKEx2- <i>pknG</i> <sub>St</sub> . Used for the production in <i>C. glutamicum</i> of C-terminally Strep-tagged <i>CgPknG</i> lacking residues 433-822.               | This work |
| pEKEx2- <i>MtbPknG</i>                           | Kan <sup>R</sup> , derived from pEKEx2- <i>pknG</i> <sub>St</sub> . Used for the production in <i>C. glutamicum</i> of C-terminally Strep-tagged full-length <i>MtbPknG</i> .                          | This work |
| pEKEx2- <i>CgPknG</i> <sub>Δ1-130</sub>          | Kan <sup>R</sup> , derived from pEKEx2- <i>pknG</i> <sub>St</sub> . Used for the production in <i>C. glutamicum</i> of C-terminally Strep-tagged <i>CgPknG</i> lacking residues 1-130.                 | This work |
| pEKEx2- <i>CgPknG</i> <sub>Δ604-661</sub>        | Kan <sup>R</sup> , derived from pEKEx2- <i>pknG</i> <sub>St</sub> . Used for the production in <i>C. glutamicum</i> of C-terminally Strep-tagged <i>CgPknG</i> lacking residues 604-661.               | This work |
| pET28a- <i>CgPknG</i>                            | Kan <sup>R</sup> , derived from pET28a. Used for the IPTG-inducible production in <i>E. coli</i> of N-terminally His6-tagged full-length <i>CgPknG</i> .                                               | This work |
| pET28a- <i>CgPknG</i> <sub>Δ1-129,Δ434-822</sub> | Kan <sup>R</sup> , derived from pET28a. Used for the IPTG-inducible production in <i>E. coli</i> of N-terminally His6-tagged full-length <i>CgPknG</i> lacking residues 1-129 and 434-822.             | This work |

640



641 **FIGURES**

642 **Figure 1**

643

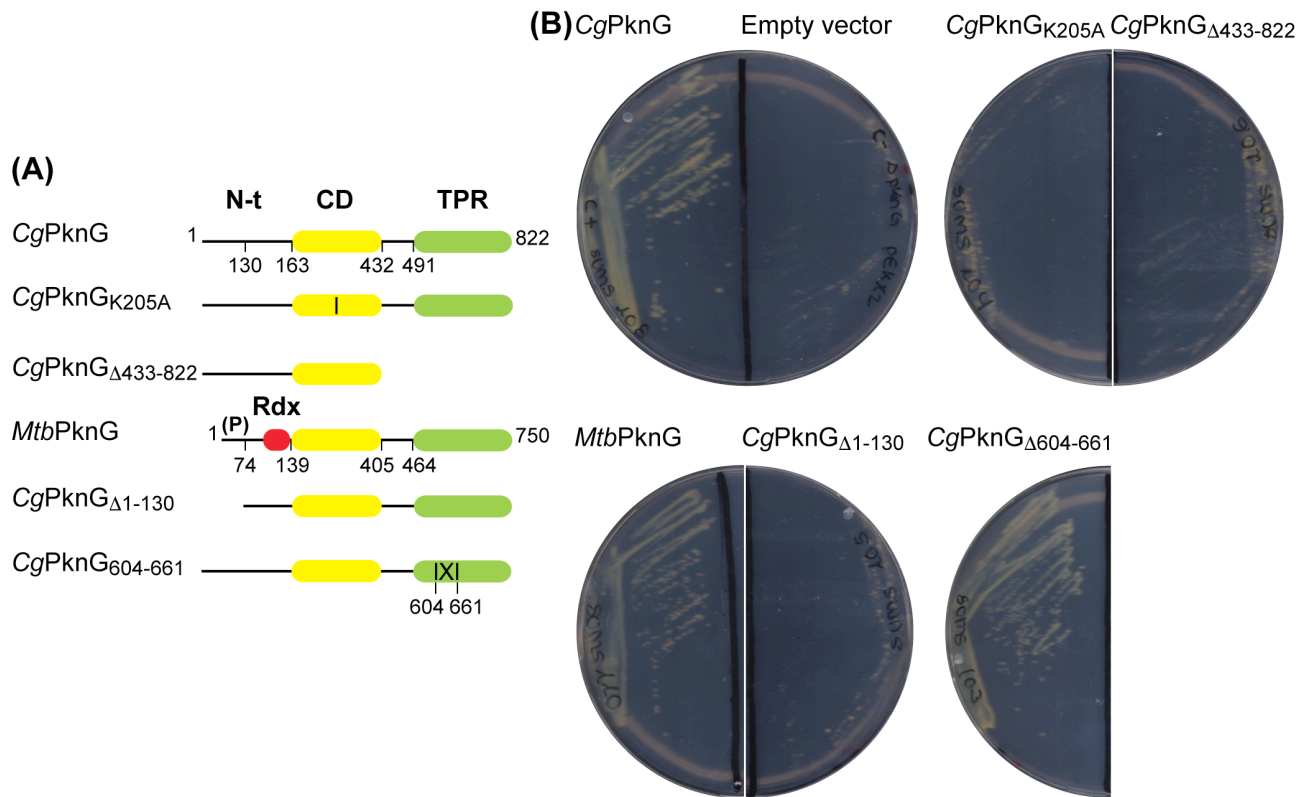

644

645

646 **Complementation of *C. glutamicum*  $\Delta$ pknG (2) with different PknG versions.** (A) Schematic  
647 representation of the kinase variants tested in complementation assays in this study. The  
648 structured domains of the protein are shown as colored rectangles: the Rdx domain in red, the  
649 catalytic domain (CD) in yellow, and the TPR domain in green. The vertical line in the CD of mutant  
650 CgPknG<sub>K205A</sub> represents the amino acid substitution. The (P) symbol indicates the cluster of  
651 autophosphorylation sites in the N-terminal region (N-t) of MtbPknG (13). The IXI symbol in the  
652 TPR domain of CgPknG<sub>604-661</sub> represents an internal segment of deleted amino acids. (B)  
653 Complementation of the  $\Delta$ pknG strain with different pknG versions. Complementation was

654 assessed by growth on CGXII plates with 100 mM glutamine as sole carbon source after 3 days at  
655 30°C. PknG variants capable to complement the  $\Delta pknG$  strain were *CgPknG*, *MtbPknG* and  
656 *CgPknG* <sub>$\Delta$ 604-661</sub>. The empty pEKEx2 vector was used as a negative control.

657 **Figure 2**

658

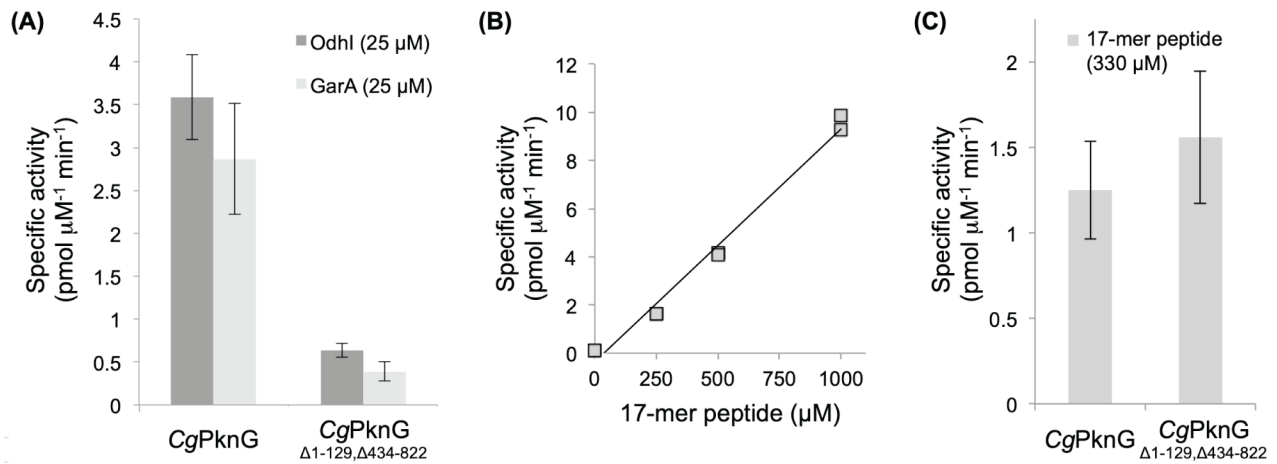

659

660

661 **CgPknG and CgPknG<sub>Δ1-129, Δ434-822</sub> and their relative kinase activities.** (A) Relative kinase activities  
662 of CgPknG and CgPknG<sub>Δ1-129, Δ434-822</sub> against Odhl and GarA. (B) Kinase activity of CgPknG for  
663 different concentrations of the 17-mer peptide substrate SDEVTVETTSVFRADFL. (C) Relative kinase  
664 activity of CgPknG and CgPknG<sub>Δ1-129, Δ434-822</sub> against the 17-mer peptide. Measurements were  
665 performed at least twice; error bars represent the scattering among average values obtained in  
666 independent determinations.

667

668 **Figure 3**

669

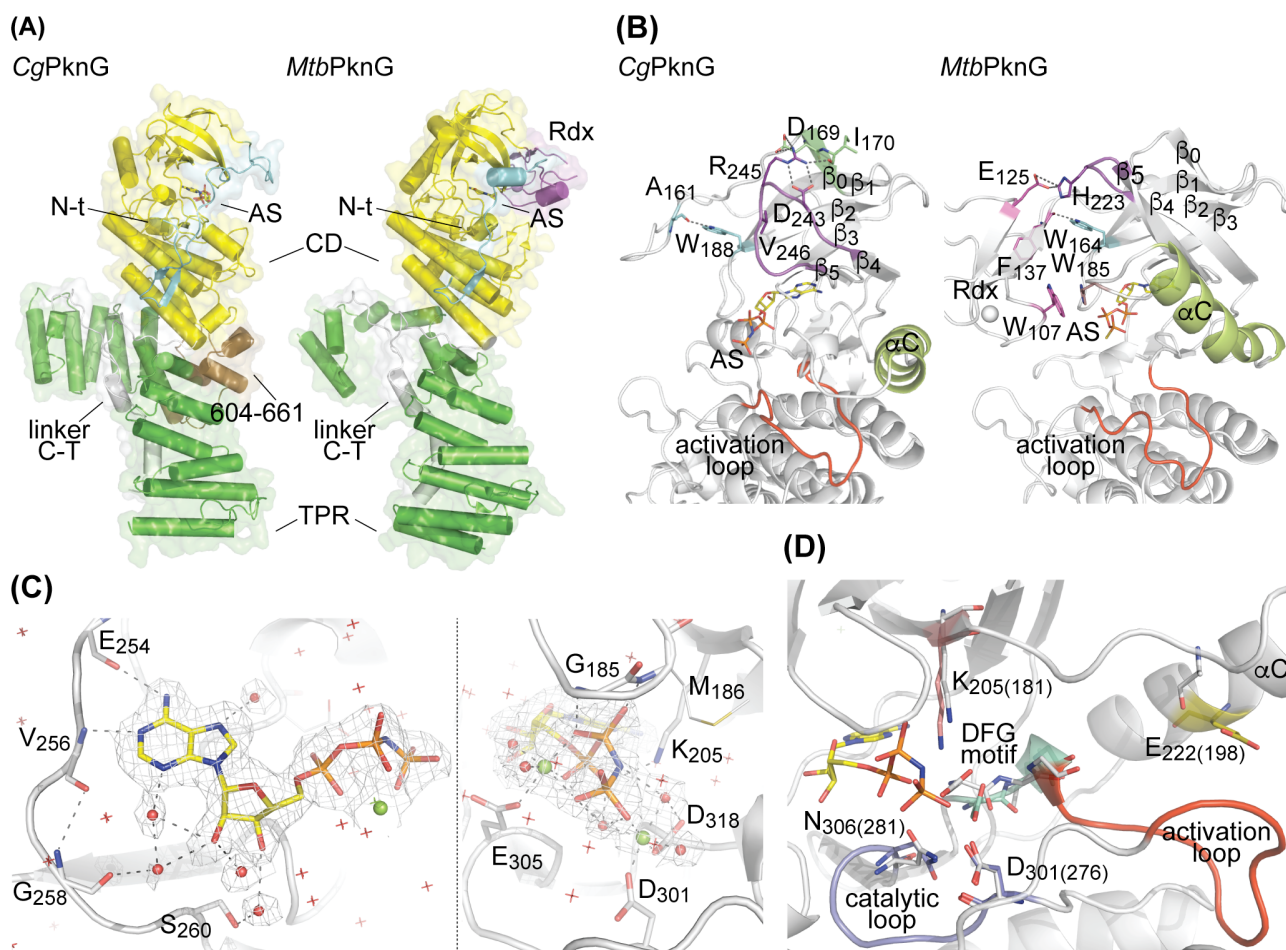

670

671

672 **The crystal structure of CgPknG<sub>ΔN-t</sub>.** (A) Comparison of CgPknG<sub>ΔN-t</sub> and MtbPknG<sub>Δ1-73</sub> (12) (PDB

673 code 2PZI). The chain A in each crystal structure is shown (RMSD of 2.35 Å for 532 aligned

674 residues). The non-hydrolysable ATP analog AMP-PNP bound to the active site (AS) of CgPknG<sub>ΔN-t</sub>

675 is depicted in sticks. N-t: N-terminal region; CD: catalytic domain; linker C-T: linker between the

676 catalytic domain and the TPR domain. (B) Comparison of CgPknG<sub>ΔN-t</sub> and MtbPknG<sub>Δ1-73, Δ406-750</sub> (13)

677 (PDB code 4Y12). The highlighted kinase domain residues or motifs adopt distinct conformations

678 in the absence or in the presence of an Rdx domain. (C) The ATP binding site of CgPknG<sub>ΔN-t</sub> with a

679 bound AMP-PNP molecule. The AMP-PNP molecule and the protein residues interacting with it are  
680 shown in sticks. Water molecules are depicted as red spheres or stars and Mg(II) atoms are shown  
681 as green spheres. The *2mFo*-*DFc* electron density is contoured to 1.0  $\sigma$  and presented as a mesh.  
682 Dashed lines represent atomic interactions. (D) Functionally important and conserved residues  
683 within the kinase active site are shown for *CgPknG* <sub>$\Delta$ N-t</sub>. Gray sticks correspond to residues in  
684 *MtbPknG* <sub>$\Delta$ 1-73,  $\Delta$ 406-750</sub> (13) (PDB code 4Y12), numbered between brackets.  
685

686 **Figure 4**

687

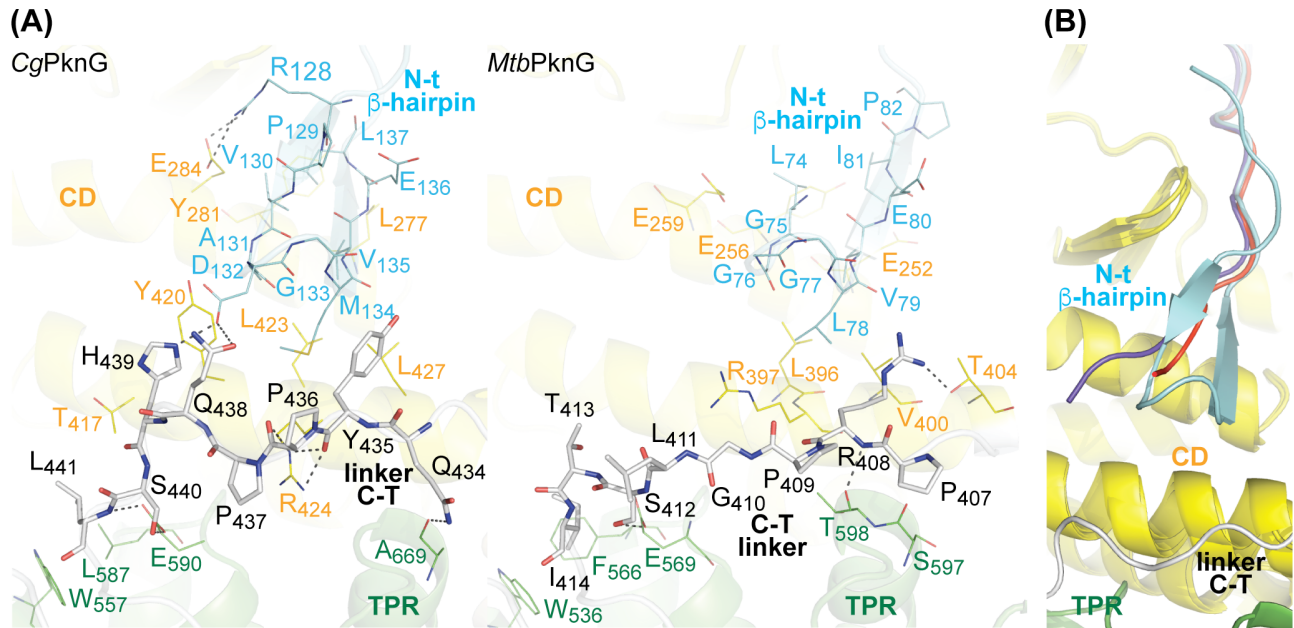

688

689

690 **The linker C-T simultaneously interacts with an N-terminal  $\beta$ -hairpin, the catalytic core and the**

691 **TPR domain of PknG.** (A) Comparison of the crystal structures of CgPknG $\Delta_{N-t}$  (this work) and

692 MtbPknG $\Delta_{1-73}$  (12) (PDB code 2PZI). The chain A in each crystal structure is shown. Selected

693 residues within the linker C-T are shown in sticks. Residues conforming the N-terminal  $\beta$ -hairpin

694 are depicted as lines. Residues of the catalytic core or the TPR domain involved in polar or

695 hydrophobic interactions with the N-terminal  $\beta$ -hairpin or the linker C-T are also shown as lines.

696 Dashed lines represent polar interactions. (B) The crystal structures of CgPknG $\Delta_{N-t}$  and CgPknG $\Delta_{1-129, \Delta 434-822}$

697 are superimposed. The RMSD values between the chain A in the structure of CgPknG $\Delta_{N-t}$

698 and the structures of CgPknG $\Delta_{1-129, \Delta 434-822}$  are 1.04 Å and 0.79 Å for 282 and 288 aligned residues,

699 respectively. The N-terminal extension of CgPknG $\Delta_{1-129, \Delta 434-822}$  is colored in blue or red.

700 **Figure 5**

701

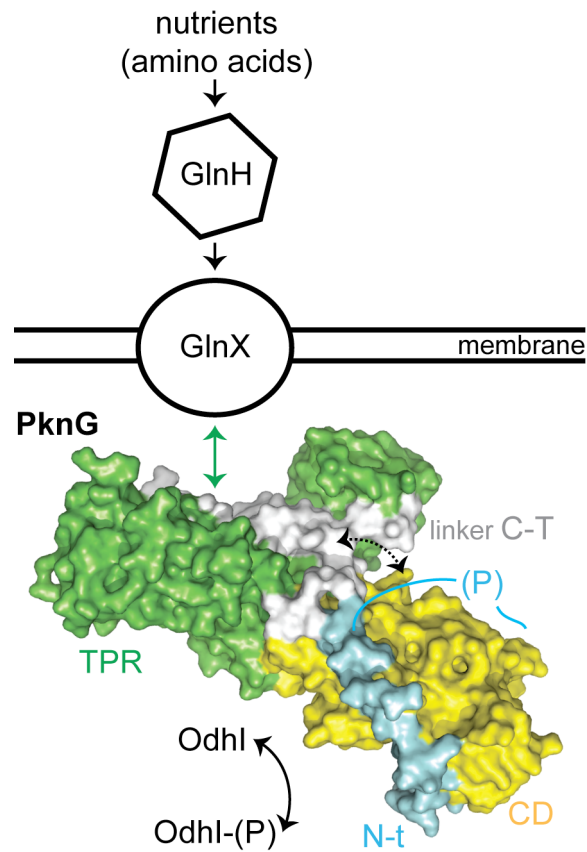

702

703

704 **Proposed model for the role of the TPR domain in the CgPknG function.** The available genetic,  
705 biochemical, and structural evidence suggests that the TPR domain might act as a localization  
706 scaffold that, providing a surface for the interaction between the kinase and the transmembrane  
707 protein GlnX, would couple signal detection to Odh1 phosphorylation by modulating the  
708 conformation of the linker C-T.

709
